# Supplementary material
Source: Springer Nature journal article supplement (https://www.springermedizin.de/resource/supplementary/13058_2013_3553_MOESM12_ESM.pdf/9703942)

A

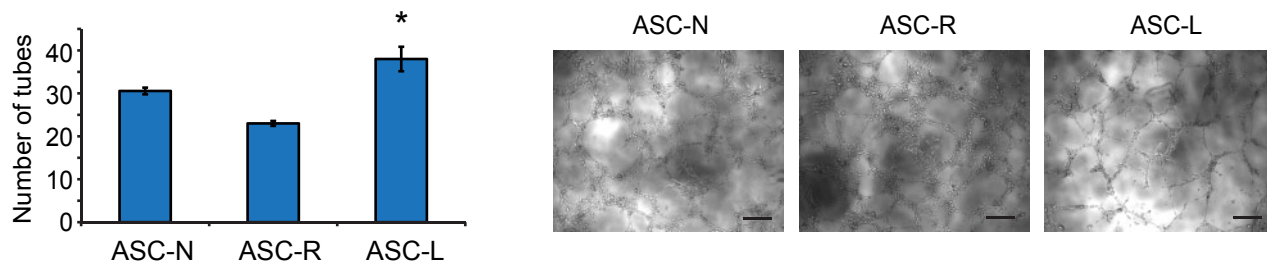

B

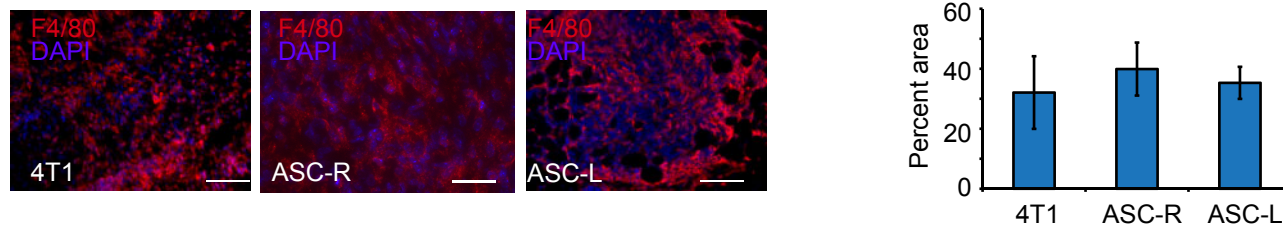

C

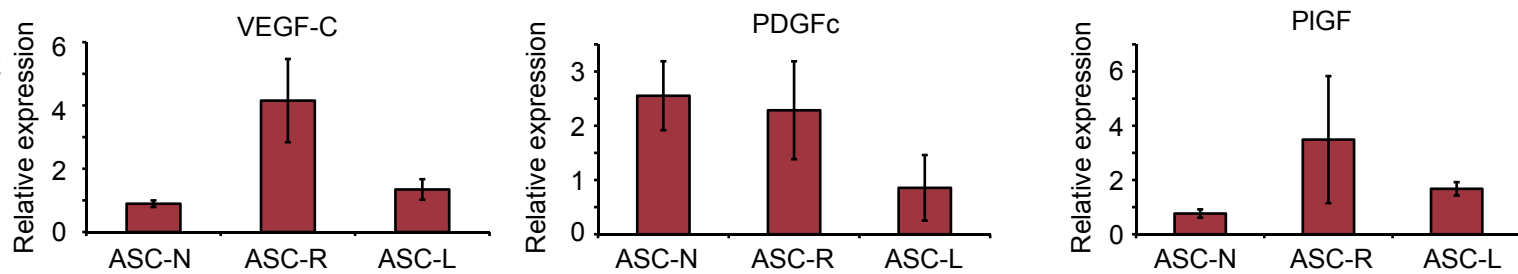

Supplement: MOESM12 [file 9703942]
